# Supplementary material for: First evidence of microplastics in Antarctic snow
Source: Copernicus journal article supplement (doi:10.5194/tc-2021-385), 2022-01-04
Supplement: Supplementary file 1 [file tc-2021-385-supplement.pdf]

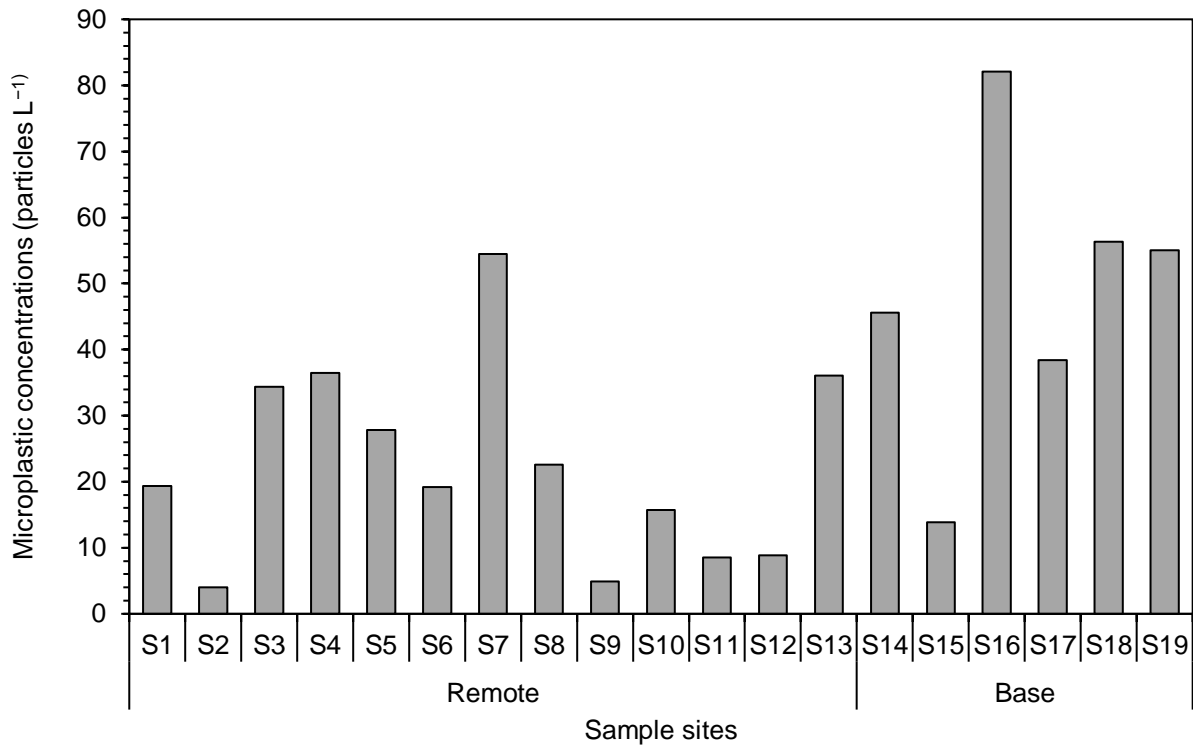

Fig. S1. Microplastic concentrations identified at each sample site from the Ross Island region of Antarctica

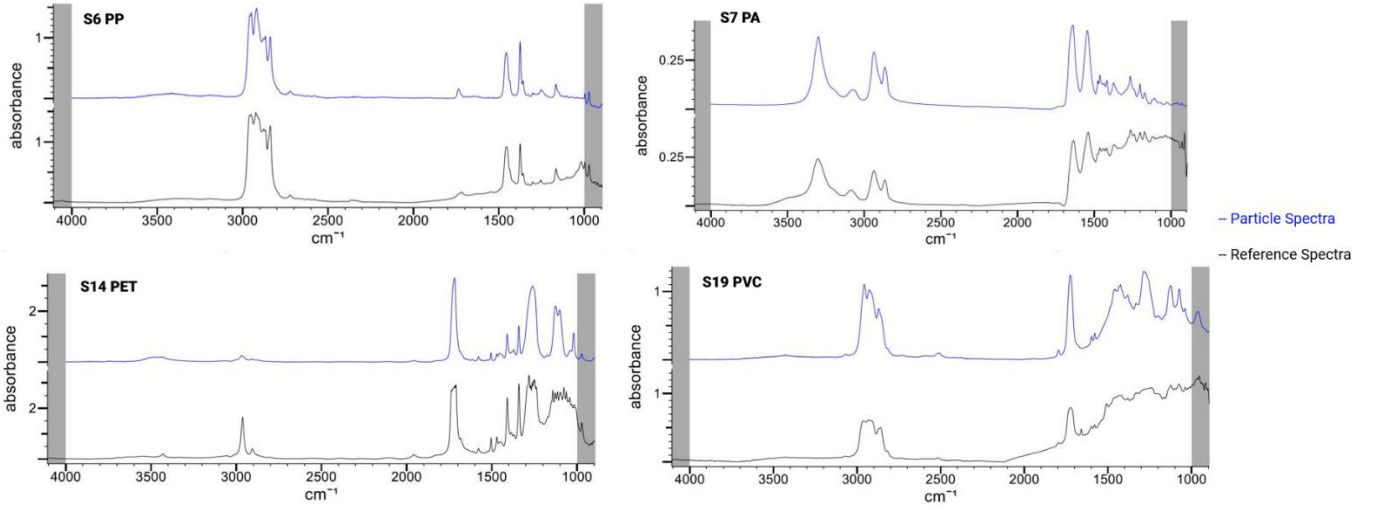

Fig. S2. Examples of identified particle spectra against polymer reference spectra for four identified polymers

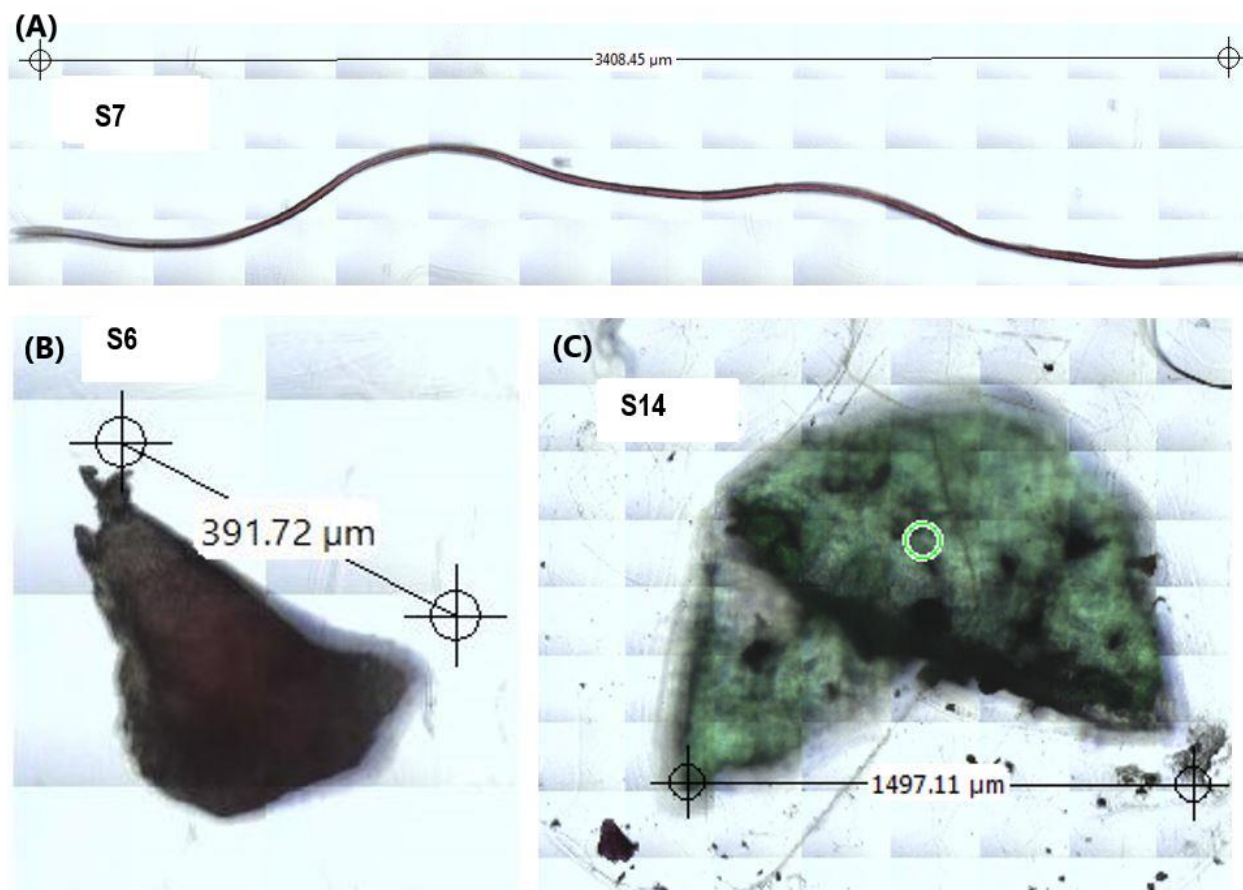

Fig. S3. Example images of identified plastics from three Antarctic samples. (A) Polyamide fibre from S7, (B) Polypropylene fragment from S6, (C) PET film from S14
